# Supplementary material
Source: bioRxiv or medRxiv preprint supplement (https://www.biorxiv.org/highwire/filestream/34943/field_highwire_adjunct_files/9/119420-5.pdf)
Supplement: Supplementary file [file 119420-5.pdf]

BCSL\_114 (complete genomes)

genome annotation: Prokka

protein-coding gene annotations

pan-genome construction: Roary

59,989 orthologous sequence clusters

cluster filtering

8,954 orthologous sequence clusters

multiple sequence alignment: MAFFT

8,954 aligned sequence clusters

gene model construction: hmmbuild

HAMSTR\_FULL\_MGES\_REMOVED
